# Supplementary material
Source: publisher figshare collection journal article supplement (https://rs.figshare.com/ndownloader/files/13323287)
Supplement: Supplementary file 1 [file 13323287]

## Sheet: pRDA
Call:
rda(formula = cotter01RAHell ~ CondCS + Velocity.1 + CunAll01CS + Binary_Bio + Condition(Mesocosm), data = env5)
Partitioning of variance:
Inertia Proportion
Total 0.491788 1.00000
Conditioned 0.007044 0.01432
Constrained 0.062306 0.12669
Unconstrained 0.422438 0.85898
Eigenvalues, and their contribution to the variance
after removing the contribution of conditiniong variables
Importance of components:
RDA1 RDA2 RDA3 RDA4 PC1 PC2 PC3 PC4 PC5
Eigenvalue 0.02720 0.02009 0.008583 0.006434 0.05173 0.04126 0.03656 0.02858 0.02510
Proportion Explained 0.05612 0.04143 0.017705 0.013273 0.10672 0.08512 0.07541 0.05896 0.05177
Cumulative Proportion 0.05612 0.09756 0.115261 0.128534 0.23526 0.32038 0.39579 0.45475 0.50653
PC6 PC7 PC8 PC9 PC10 PC11 PC12 PC13 PC14
Eigenvalue 0.02303 0.02117 0.01746 0.01524 0.01385 0.01258 0.01051 0.01013 0.009046
Proportion Explained 0.04751 0.04367 0.03602 0.03144 0.02857 0.02596 0.02167 0.02091 0.018661
Cumulative Proportion 0.55404 0.59771 0.63373 0.66517 0.69374 0.71970 0.74137 0.76228 0.780943
PC15 PC16 PC17 PC18 PC19 PC20 PC21 PC22
Eigenvalue 0.00894 0.008457 0.008167 0.00690 0.006174 0.005732 0.005177 0.004895
Proportion Explained 0.01844 0.017447 0.016848 0.01423 0.012736 0.011826 0.010681 0.010098
Cumulative Proportion 0.79939 0.816833 0.833680 0.84791 0.860650 0.872476 0.883157 0.893255
PC23 PC24 PC25 PC26 PC27 PC28 PC29 PC30
Eigenvalue 0.004001 0.003826 0.003593 0.003302 0.002852 0.002694 0.002551 0.002207
Proportion Explained 0.008254 0.007892 0.007412 0.006812 0.005883 0.005558 0.005262 0.004553
Cumulative Proportion 0.901509 0.909401 0.916814 0.923626 0.929509 0.935067 0.940329 0.944882
PC31 PC32 PC33 PC34 PC35 PC36 PC37 PC38
Eigenvalue 0.001996 0.001880 0.001643 0.001549 0.001453 0.001360 0.001176 0.001161
Proportion Explained 0.004118 0.003878 0.003390 0.003194 0.002997 0.002806 0.002427 0.002395
Cumulative Proportion 0.949000 0.952878 0.956268 0.959463 0.962459 0.965265 0.967692 0.970086
PC39 PC40 PC41 PC42 PC43 PC44 PC45 PC46
Eigenvalue 0.001103 0.001070 0.001027 0.0009674 0.0008368 0.0007797 0.0006858 0.0006774
Proportion Explained 0.002276 0.002208 0.002118 0.0019956 0.0017264 0.0016085 0.0014147 0.0013975
Cumulative Proportion 0.972362 0.974570 0.976689 0.9786843 0.9804106 0.9820191 0.9834338 0.9848313
PC47 PC48 PC49 PC50 PC51 PC52 PC53
Eigenvalue 0.0006323 0.0005764 0.0005457 0.0004889 0.0004455 0.0004043 0.0003703
Proportion Explained 0.0013043 0.0011890 0.0011258 0.0010087 0.0009190 0.0008341 0.0007638
Cumulative Proportion 0.9861356 0.9873246 0.9884504 0.9894591 0.9903781 0.9912122 0.9919760
PC54 PC55 PC56 PC57 PC58 PC59 PC60
Eigenvalue 0.0003516 0.0003235 0.0003087 0.0002801 0.0002727 0.0002537 0.0002314
Proportion Explained 0.0007252 0.0006673 0.0006369 0.0005779 0.0005625 0.0005234 0.0004774
Cumulative Proportion 0.9927013 0.9933686 0.9940055 0.9945834 0.9951458 0.9956692 0.9961466
PC61 PC62 PC63 PC64 PC65 PC66 PC67
Eigenvalue 0.0002202 0.0002130 0.0001930 0.0001739 0.0001498 0.0001300 0.0001121
Proportion Explained 0.0004543 0.0004395 0.0003982 0.0003587 0.0003089 0.0002681 0.0002312
Cumulative Proportion 0.9966009 0.9970403 0.9974386 0.9977973 0.9981063 0.9983744 0.9986056
PC68 PC69 PC70 PC71 PC72 PC73 PC74
Eigenvalue 0.0001027 8.683e-05 8.333e-05 7.717e-05 6.989e-05 5.986e-05 4.759e-05
Proportion Explained 0.0002119 1.791e-04 1.719e-04 1.592e-04 1.442e-04 1.235e-04 9.818e-05
Cumulative Proportion 0.9988175 9.990e-01 9.992e-01 9.993e-01 9.995e-01 9.996e-01 9.997e-01
PC75 PC76 PC77 PC78 PC79 PC80 PC81
Eigenvalue 3.747e-05 3.316e-05 2.180e-05 1.727e-05 1.422e-05 1.232e-05 6.789e-06
Proportion Explained 7.731e-05 6.840e-05 4.498e-05 3.562e-05 2.933e-05 2.542e-05 1.401e-05
Cumulative Proportion 9.998e-01 9.998e-01 9.999e-01 9.999e-01 9.999e-01 1.000e+00 1.000e+00
PC82 PC83
Eigenvalue 3.029e-06 2.462e-06
Proportion Explained 6.249e-06 5.080e-06
Cumulative Proportion 1.000e+00 1.000e+00
Accumulated constrained eigenvalues
Importance of components:
RDA1 RDA2 RDA3 RDA4
Eigenvalue 0.0272 0.02009 0.008583 0.006434
Proportion Explained 0.4366 0.32237 0.137748 0.103263
Cumulative Proportion 0.4366 0.75899 0.896737 1.000000
Scaling 2 for species and site scores
* Species are scaled proportional to eigenvalues
* Sites are unscaled: weighted dispersion equal on all dimensions
* General scaling constant of scores: 2.607513
Species scores
RDA1 RDA2 RDA3 RDA4 PC1 PC2
Arhynchobdellida -0.025730 -0.0207915 0.0036181 -2.402e-03 7.674e-03 -1.606e-02
Daternomina 0.011616 -0.0018163 -0.0024835 9.951e-04 -4.201e-03 1.114e-02
Kingolus 0.023312 -0.0380774 -0.0049706 -6.362e-03 2.520e-02 2.165e-02
Kingolus.cupreus.aeratus.tyrrhenus 0.014554 -0.0183555 -0.0157531 4.253e-02 -1.391e-02 -7.312e-03
Kingolus.flavosignatus -0.001534 0.0159174 0.0109896 6.198e-03 1.382e-02 6.382e-03
Kingolus.metallicus 0.001224 0.0043969 0.0158429 4.999e-03 9.490e-03 -8.724e-04
Kingolus.tinctus 0.007665 -0.0125335 -0.0075460 8.297e-03 -1.089e-02 2.071e-02
Notriolus.Simsonia.spp. 0.008866 -0.0041088 -0.0046499 2.892e-02 2.665e-03 -4.081e-03
Simsonia.cf.angusta 0.015942 -0.0417470 -0.0158442 -2.592e-02 4.726e-02 -3.675e-03
Simsonia.L12E 0.008152 0.0053875 -0.0020437 4.558e-03 -9.344e-03 -5.971e-03
Simsonia.L2E 0.007432 0.0087212 -0.0208889 1.579e-02 1.436e-03 -1.816e-03
Simsonia.wilsoni 0.001224 0.0043969 0.0158429 4.999e-03 9.490e-03 -8.724e-04
Austronanodes -0.001248 -0.0092682 -0.0037846 7.271e-03 6.658e-03 -4.981e-03
Athericidae 0.006614 0.0002861 -0.0023646 -1.154e-03 4.268e-03 -7.178e-03
Dasyhelea -0.018965 -0.0035812 0.0007896 5.743e-03 5.460e-03 -5.514e-03
Aphroteniinae 0.016714 -0.0020851 0.0082515 1.473e-02 -4.166e-05 -7.676e-03
Corynoneura -0.083128 -0.0345122 0.0475611 -2.507e-02 -1.191e-02 -3.296e-01
Echinocladius 0.106974 -0.1155358 -0.0765141 9.837e-02 7.582e-02 -1.367e-02
Nanocladius -0.001248 -0.0092682 -0.0037846 7.271e-03 6.658e-03 -4.981e-03
Nanocladius.Psectrocladius 0.008095 -0.0011381 -0.0045432 -6.784e-05 1.940e-03 -2.731e-03
Paralimnophyes.limnophyes 0.018778 0.0123505 0.0018399 4.489e-03 -3.369e-03 3.476e-04
Rheocricotopus 0.009914 0.0063271 0.0010292 2.497e-03 -3.163e-03 -1.605e-03
Empididae 0.013639 -0.0239344 0.0434123 2.043e-03 -4.463e-02 -1.803e-02
Muscidae 0.007684 0.0035146 -0.0007195 4.643e-03 9.769e-05 2.101e-04
Psychodidae -0.010896 -0.0158109 -0.0015644 -7.801e-03 -5.327e-03 -1.261e-02
Dichetophora -0.003514 0.0010957 0.0079253 -1.510e-03 -2.073e-03 7.203e-03
Mirawarra 0.013574 -0.0036874 -0.0065074 1.073e-02 2.300e-03 4.017e-03
Cloeon -0.028044 0.0021596 0.0066727 -8.275e-03 2.295e-02 -1.603e-02
Irpacaenis 0.089469 0.0391617 0.0096258 2.375e-02 4.934e-02 9.914e-04
Irpacaenis.A.B 0.008827 -0.0114643 -0.0080332 -1.010e-02 -8.330e-04 -1.508e-03
Irpacaenis.SpA 0.027800 0.0288944 0.0525789 2.935e-02 -9.304e-03 6.473e-03
Atalophlebia.AV2 -0.001641 0.0114289 0.0089723 1.722e-02 1.393e-02 8.231e-03
Atalophlebia.AV8 0.001743 0.0071335 0.0170938 5.230e-03 7.099e-03 3.915e-04
Atalophlebia.AV9 0.004720 -0.0040506 -0.0020237 -5.646e-03 5.845e-03 -1.946e-03
Atalophlebia.cf..AV4 0.011432 -0.0014519 -0.0057297 -1.488e-03 6.537e-03 -9.903e-03
Atalophlebia.spp. -0.027018 -0.0360070 -0.0219861 1.207e-02 -1.951e-04 -4.917e-02
Austrophlebiodies 0.049767 0.0368636 0.0205111 1.251e-02 2.224e-02 6.626e-03
Kirrara.procera 0.009327 -0.0054850 -0.0064921 -4.172e-03 1.032e-03 -2.547e-03
Leptophlebiidae 0.143911 0.0789663 0.0325056 -2.159e-02 2.163e-03 -3.256e-02
Nousia 0.103345 -0.0060907 -0.0067513 -1.985e-02 1.732e-02 -4.651e-02
Coloburuscoides.spp. 0.076877 -0.0173319 -0.0012958 -8.681e-02 3.811e-03 1.334e-02
Hydridae -0.117710 0.1790416 -0.0958848 -6.619e-02 7.027e-02 4.955e-02
Lymnaeidae -0.076925 0.0942073 -0.0782391 3.129e-02 2.118e-02 -4.344e-02
Crambidae -0.011774 -0.0130409 0.0087008 -2.228e-03 -3.218e-03 -6.320e-03
Archichauliodes 0.100554 -0.0071657 -0.0371493 1.035e-02 8.830e-02 -4.716e-02
Gomphidae 0.087420 0.0056666 -0.0500970 6.631e-03 4.382e-02 -7.019e-02
Austroaeschna.inermis 0.007473 -0.0094499 -0.0088700 -1.175e-02 -1.501e-03 -1.200e-02
Austroaeschna.unicornis.pinheyi 0.011681 -0.0193796 -0.0118949 -7.392e-04 9.640e-03 -8.275e-03
Notoaeschna.sagittata -0.002845 -0.0052357 0.0069577 1.051e-02 8.253e-03 -8.575e-03
Telephlebiidae 0.006675 -0.0057284 -0.0028619 -7.984e-03 8.265e-03 -2.751e-03
Dinotoperla 0.014453 -0.0067377 -0.0085097 3.112e-02 -6.607e-03 -5.393e-03
Dinotoperla.cf.fontana 0.058005 -0.0257781 -0.0304820 -8.573e-02 -1.506e-01 5.569e-02
Illiesoperla 0.034478 -0.0213634 -0.0073873 2.155e-03 -1.286e-02 -3.075e-03
Illiesoperla.cf.brevicauda -0.004435 -0.0045716 0.0054257 -7.748e-03 -5.470e-04 8.777e-03
Leptoperla 0.046023 -0.0363372 -0.0283221 8.595e-03 2.825e-02 1.713e-02
Leptoperla.longicauda.bifida 0.007675 0.0020840 0.0002182 -3.040e-03 -3.295e-03 -5.561e-03
Newmanoperla.thoreyi 0.120346 0.0123208 0.0326681 -5.618e-03 3.418e-02 -6.166e-03
Trinotoperla.nivata.minor 0.001776 -0.0080329 -0.0051362 -2.363e-03 1.078e-03 2.617e-03
Plecoptera 0.012054 0.0144071 0.0028653 1.069e-03 -1.709e-02 -7.673e-05
Anisocentropus 0.014874 0.0443283 0.0129426 -3.452e-02 9.169e-03 -2.858e-02
Coenoria 0.006025 -0.0015419 -0.0032438 1.308e-02 -2.195e-03 -5.140e-03
Conoesucidae.spp. -0.019130 -0.2912653 -0.0410783 -3.320e-02 -5.863e-01 3.081e-01
Conoesucus.AV4 -0.001263 -0.0102085 -0.0036655 7.851e-03 -1.173e-03 7.368e-03
Conoesucus.sp. -0.044178 0.0525712 -0.0644244 1.548e-02 1.824e-02 4.616e-03
Lingora.AV1 0.104802 -0.1510467 -0.0734048 -7.836e-02 -2.750e-01 -5.646e-02
Agapetus.AV1 0.338753 -0.0628623 0.0042291 3.018e-02 -5.909e-02 -4.235e-01
Helicopsyche.heacota 0.007958 -0.0029476 -0.0132116 -7.293e-03 1.285e-02 -1.333e-02
Taschorema.complex 0.008593 0.0022890 0.0113288 -3.775e-03 -1.079e-02 -2.466e-03
Asmicridea.AV1 -0.012921 -0.0301104 0.0183526 -1.872e-02 -1.935e-02 -4.571e-02
Cheumatopsyche.AV1 -0.049186 -0.1676036 0.0804018 -5.389e-02 -3.766e-02 -1.563e-01
Hellyethira.cf.exsertaorcubitans 0.006545 -0.0024404 -0.0028482 8.554e-04 -1.235e-03 -6.031e-03
Hydroptila.cf.obscura.losida -0.021632 0.0424944 0.0193844 -1.827e-02 -2.171e-02 -2.748e-02
Leptoceridae.spp. 0.005508 -0.0200750 0.0317375 4.650e-02 -3.386e-03 3.611e-02
Notalina 0.025259 0.0047922 0.0055458 2.438e-02 3.085e-03 -1.164e-02
Notalina.cf.spira -0.014176 -0.0026632 0.0159521 1.991e-02 2.579e-02 1.062e-02
Notalina.fulva 0.039506 -0.1166517 0.0995598 4.062e-02 1.094e-01 5.840e-02
Oecetis -0.066609 0.0116605 0.1257675 1.216e-01 4.383e-01 2.656e-01
GenusI.AV1 -0.035593 0.0124222 0.0340594 -1.380e-02 2.715e-03 2.264e-03
Neureclipsis.napaea 0.024954 0.0450725 0.1583335 -8.808e-02 6.553e-03 -1.420e-01
Paranyctiophylax.AV4 -0.055528 0.0019151 0.0686628 -4.609e-02 7.641e-02 1.013e-01
Plectrocnemia 0.008864 0.0060235 0.0008107 1.992e-03 -2.058e-04 1.953e-03
Polycentropodidae -0.005220 0.0373175 -0.0116175 5.504e-02 5.906e-02 -5.947e-03
Tasimia.AV1 0.053176 -0.0036628 0.0315850 -1.402e-02 6.642e-02 2.604e-02
Sclerocyphon.cf..zwicki 0.007798 -0.0004448 -0.0050635 -4.157e-04 1.197e-02 5.407e-03
Sclerocyphon.striatus 0.021358 -0.0010327 -0.0061645 1.227e-02 1.417e-02 2.377e-02
Sclerocyphon 0.068229 -0.0156307 -0.0090240 3.967e-02 1.127e-01 5.617e-02
Austrophlebiodies.pusillus 0.304119 0.1881122 0.0238444 -2.978e-02 -3.593e-02 -1.462e-01
Zygoptera -0.006604 0.0081843 -0.0049002 -1.704e-02 1.669e-03 -1.791e-03
Site scores (weighted sums of species scores)
RDA1 RDA2 RDA3 RDA4 PC1 PC2
1.1 0.18150 -0.4314580 -0.7459796 -0.156363 -0.290741 0.04000
1.2 0.40227 0.0008476 -0.3255690 0.123015 -0.076266 -0.23066
1.3 0.38476 0.1100849 -0.3179183 0.615710 0.029299 -0.03704
2.1 0.31245 0.1053295 0.0484990 0.088294 0.253148 -0.19686
2.2 0.39931 0.0477538 -0.0277337 -0.148310 0.071656 -0.10086
2.3 0.12411 -0.2983606 -0.4218000 -0.620268 -0.440876 0.04368
3.1 0.02843 -0.5998750 -0.4363401 -0.179228 -0.057182 0.11850
3.2 -0.14229 -0.1866792 -0.2256595 1.609718 0.453308 0.20467
3.3 -0.10185 0.0378340 0.1989283 0.928071 0.390639 0.46026
4.1 -0.26120 0.1629155 0.8617885 -0.102034 0.393961 0.26655
4.2 -0.15636 0.2168586 0.7210074 0.231488 0.331883 -0.08998
4.3 0.22217 0.1929916 0.2795546 -0.346436 -0.276511 -0.01822
5.1 -0.25045 -0.1365168 0.3260176 -0.361536 -0.020706 0.33224
5.2 0.19388 0.5725363 0.1880516 0.295622 0.293134 -0.37504
5.3 -0.01361 0.0200725 0.3824454 -0.290187 -0.146219 -0.03642
6.1 0.10667 -0.3561133 0.0713731 0.093872 0.052357 0.12708
6.2 0.16528 -0.2194034 0.1830992 0.429715 0.061279 -0.11744
6.3 0.13497 -0.0683325 0.2057685 -0.107407 -0.070807 -0.16577
7.1 -0.20040 -0.3895603 -0.4261012 -1.131641 -0.343781 0.19115
7.2 0.04359 -0.1927097 0.6835573 -0.489240 -0.156163 -0.28961
7.3 0.10602 0.0702101 0.1595609 0.470647 -0.114009 0.03398
8.1 -0.24921 -0.4394157 -0.0714343 -0.101821 -0.044346 -0.12843
8.2 0.04427 -0.1365140 -0.1611015 0.188508 -0.108342 0.07350
8.3 -0.94304 1.0630599 -0.9931682 0.392586 0.355022 0.15263
9.1 -0.45971 -0.4965550 -1.1263017 -0.555639 -0.648137 0.47289
9.2 -0.26618 0.5434369 -0.4696550 -0.857487 -0.240393 -0.18500
9.3 -0.13169 0.9450461 0.6748651 0.297055 0.297144 0.13721
10.1 0.25879 -0.2894733 -0.2940514 -0.169051 -0.019346 -0.03502
10.2 0.58731 -0.0298669 -0.0164610 -0.142793 -0.048946 -0.23912
10.3 0.47247 -0.0833946 -0.1317291 0.285465 -0.109998 -0.18578
11.1 0.06512 0.3319491 0.3796236 -0.965793 0.061272 -0.66783
11.2 -0.41114 -0.2066415 0.4384706 -0.122260 -0.070468 0.24489
11.3 0.26332 0.1432419 -0.5870085 -0.576619 -0.538896 -0.31751
12.1 -0.16425 -0.6280867 -0.4964999 -0.482460 -0.348085 -0.33231
12.2 -0.18427 -0.5463438 0.3572334 -0.438266 -0.184281 -0.34395
12.3 -0.43127 -0.1945820 0.9041064 0.422003 0.016900 -0.09922
13.1 -0.26145 -0.3817304 -0.2241582 -0.536530 -0.112883 0.15365
13.2 -0.58184 0.2853810 0.1569107 0.029744 0.163380 0.53486
13.3 -0.25796 -0.1900752 0.4829935 0.542547 -0.192052 0.41015
14.1 0.39879 -0.2587693 -0.7085455 -0.590689 -0.153468 -0.05625
14.2 0.29878 0.0970106 -0.0636904 0.343308 0.136736 0.14166
14.3 0.38196 0.4486051 0.0834586 -0.259284 0.004697 0.01010
15.1 -0.08898 0.3704072 0.8141663 -0.176644 0.513986 -0.10516
15.2 0.05317 0.0012690 0.1014551 0.430478 0.069194 0.16845
15.3 0.05601 0.6904818 0.4840988 0.546820 0.215860 0.01190
16.1 -0.46615 -0.2731664 -0.2423154 0.592943 -0.055047 0.45052
16.2 -0.63107 0.5225061 0.4086999 1.535174 0.703047 0.20636
16.3 -0.59433 -0.2562956 -0.4868496 -0.462015 -0.498789 0.32013
17.1 -0.27523 -0.6772710 -0.9331689 -0.514857 -0.355333 0.42433
17.2 0.07626 0.0038894 0.2225263 0.359865 0.300265 -0.22464
17.3 -0.13972 -0.1425456 0.3728763 -0.085917 0.005691 0.09981
18.2 0.48677 -0.0624085 -0.3272337 0.449452 0.196815 -0.33099
18.3 0.47526 0.1366761 0.1515296 0.186545 0.072679 0.03053
19.1 -0.52683 0.1891202 0.7235946 -0.165951 0.404135 0.30193
19.2 -0.13066 0.1637250 0.3620944 -0.465493 -0.140101 -0.28215
19.3 0.25537 0.5878328 0.4148388 1.074628 0.353408 -0.03249
20.1 0.32715 -0.3768352 -0.4846178 -1.025036 -0.458398 -0.01869
20.2 0.42644 0.0434236 0.0249203 0.461073 0.200134 -0.06998
20.3 0.52454 0.0972245 -0.3488429 -0.747310 -0.396749 -0.25353
21.1 -0.09408 -0.4857802 -0.7073841 0.539431 0.222455 -0.16266
21.2 -0.09978 -0.8271376 -0.4791246 -0.225683 -0.452233 0.14841
21.3 -0.18195 -0.4772419 -0.6005635 0.853288 -0.151090 -0.16126
22.1 0.39810 0.2251620 0.3036739 -0.332199 0.305233 -0.10161
22.2 -0.23038 0.7836970 0.7125409 0.207103 0.566155 0.27232
22.3 0.65935 0.5035933 0.1411640 0.006776 0.059194 -0.30408
23.1 -0.23574 -0.3197234 -0.1066371 -0.060940 -0.191172 0.31258
23.2 -0.31570 1.2145113 -0.7659554 -0.411097 0.232632 0.20883
23.3 -0.08019 0.7655908 -0.4654800 -1.440208 -0.436640 0.07139
24.1 -0.15533 -0.0160651 0.4302145 0.287150 0.052015 -0.05579
24.2 -0.09810 -0.0362327 0.8240527 0.102314 0.074297 0.25842
24.3 0.16664 0.3156014 -0.3786575 -0.316348 -0.093684 -0.05365
25.1 -0.37458 -0.3509214 0.6148647 -0.712657 -0.109384 -0.21485
25.2 -0.65550 -0.1620024 0.5213218 0.559101 0.133855 -0.13518
25.3 -0.35894 0.3712164 0.3750149 1.603851 0.581566 0.23949
26.1 -0.13926 -0.0190368 0.0175059 -1.190166 -0.110018 -0.87053
26.2 -0.58222 0.6285334 -0.2928269 -0.020807 0.325164 -0.04719
26.3 -0.30993 0.5055040 -0.8175443 0.496783 -0.001215 -0.46178
27.1 0.37974 0.0143858 -0.6088057 0.017872 0.332778 -0.48665
27.2 0.34832 0.0167025 0.0171783 0.404097 0.176887 -0.36220
27.3 0.23449 -0.2422678 0.2417817 0.013904 -0.087268 -0.13909
28.1 0.49031 0.0954245 0.3270603 -0.528923 0.021101 0.09374
28.2 0.40460 0.5482021 0.2639293 0.204461 0.322477 -0.06366
28.3 0.48715 0.3066894 -0.0009149 -0.074531 -0.142647 -0.07240
29.1 -0.01665 -0.1462879 0.4683574 -0.614194 -0.101628 -0.14227
29.2 -0.09654 -0.4244209 0.6448100 0.335951 -0.040898 -0.23970
29.3 0.08799 -0.1764886 0.0884929 0.195088 -0.248010 -0.02947
30.1 0.47675 -0.2995988 -0.3219276 -0.539759 -0.257266 -0.11242
30.2 0.48817 0.1031168 0.2662901 -0.509288 -0.174958 -0.29532
30.3 0.47990 0.2336585 -0.0479761 0.461204 -0.010379 0.09847
31.1 -0.27043 -0.5516588 -0.4308240 -0.624783 -0.297677 0.51970
31.2 -0.15276 -0.3827426 -0.4138165 0.145602 -0.159903 0.61045
31.3 -0.05243 -0.3937913 -0.5387215 0.542871 -0.142920 0.49250
32.1 -0.22054 -0.3252215 -0.1265176 -0.623727 -0.097580 0.23211
32.2 -0.21836 -0.5437967 -0.0035113 0.442981 -0.039874 0.25049
32.3 -0.09819 -0.1039139 0.0747560 1.155704 0.256921 0.10515
Site constraints (linear combinations of constraining variables)
RDA1 RDA2 RDA3 RDA4 PC1 PC2
1.1 0.170618 -0.36092 -0.197359 -0.159089 -0.290741 0.04000
1.2 0.182519 -0.12496 -0.248792 0.090846 -0.076266 -0.23066
1.3 0.151589 0.17789 -0.426078 0.322104 0.029299 -0.03704
2.1 0.233469 -0.19435 -0.273725 -0.275797 0.253148 -0.19686
2.2 0.298931 -0.04203 -0.167774 -0.002505 0.071656 -0.10086
2.3 0.296916 0.21567 -0.260100 0.241361 -0.440876 0.04368
3.1 0.273364 -0.23730 -0.169411 -0.269998 -0.057182 0.11850
3.2 0.295189 -0.01684 -0.191685 -0.015735 0.453308 0.20467
3.3 0.367276 0.12514 -0.066271 0.260445 0.390639 0.46026
4.1 -0.052056 -0.12443 0.307009 -0.365614 0.393961 0.26655
4.2 -0.031524 0.09806 0.280937 -0.111915 0.331883 -0.08998
4.3 0.090214 0.16249 0.552245 0.185917 -0.276511 -0.01822
5.1 -0.167887 -0.17306 0.205394 -0.293323 -0.020706 0.33224
5.2 -0.098491 -0.02689 0.322902 -0.018316 0.293134 -0.37504
5.3 -0.047369 0.14783 0.386716 0.248723 -0.146219 -0.03642
6.1 0.086224 -0.39004 -0.249391 -0.114747 0.052357 0.12708
6.2 0.142268 -0.22301 -0.171115 0.154438 0.061279 -0.11744
6.3 0.194304 -0.04973 -0.104616 0.421875 -0.070807 -0.16577
7.1 -0.076170 -0.06251 0.231564 -0.392682 -0.343781 0.19115
7.2 -0.029960 0.11987 0.280944 -0.127786 -0.156163 -0.28961
7.3 -0.008744 0.34129 0.256880 0.126211 -0.114009 0.03398
8.1 -0.312895 -0.25423 0.110309 -0.193884 -0.044346 -0.12843
8.2 -0.217304 -0.14896 0.304789 0.092546 -0.108342 0.07350
8.3 -0.519035 0.57678 -0.668211 0.205716 0.355022 0.15263
9.1 -0.347460 0.32426 -0.514991 -0.493365 -0.648137 0.47289
9.2 -0.348689 0.58072 -0.605005 -0.249155 -0.240393 -0.18500
9.3 -0.032972 0.34223 0.236285 0.133265 0.297144 0.13721
10.1 0.204992 -0.26624 -0.186559 -0.234583 -0.019346 -0.03502
10.2 0.259459 -0.09675 -0.112917 0.033914 -0.048946 -0.23912
10.3 0.309551 0.07957 -0.052132 0.300503 -0.109998 -0.18578
11.1 -0.180233 -0.12239 0.177254 -0.322567 0.061272 -0.66783
11.2 -0.119459 0.03725 0.269426 -0.051320 -0.070468 0.24489
11.3 -0.150520 0.34030 0.091755 0.179881 -0.538896 -0.31751
12.1 -0.486552 -0.36642 0.014310 -0.067170 -0.348085 -0.33231
12.2 -0.382643 -0.27414 0.233229 0.222887 -0.184281 -0.34395
12.3 -0.326771 -0.10685 0.310999 0.491997 0.016900 -0.09922
13.1 -0.078045 -0.11328 0.320229 -0.371411 -0.112883 0.15365
13.2 -0.205042 0.33959 -0.139338 -0.182045 0.163380 0.53486
13.3 0.055239 0.18768 0.539059 0.176201 -0.192052 0.41015
14.1 0.281563 -0.20295 -0.119895 -0.304554 -0.153468 -0.05625
14.2 0.324531 -0.01550 -0.080040 -0.041072 0.136736 0.14166
14.3 0.369403 0.16897 -0.034593 0.223241 0.004697 0.01010
15.1 -0.098928 -0.05492 0.246127 -0.396724 0.513986 -0.10516
15.2 -0.091580 0.18815 0.181315 -0.148774 0.069194 0.16845
15.3 0.053008 0.21691 0.519764 0.159022 0.215860 0.01190
16.1 -0.534370 -0.42604 0.036183 -0.020104 -0.055047 0.45052
16.2 -0.768629 0.19434 -0.738560 0.122488 0.703047 0.20636
16.3 -0.507981 0.04185 -0.059083 0.480894 -0.498789 0.32013
17.1 -0.100983 -0.60272 -0.215678 0.063690 -0.355333 0.42433
17.2 -0.056266 -0.41800 -0.170686 0.327935 0.300265 -0.22464
17.3 -0.005823 -0.24223 -0.108869 0.594677 0.005691 0.09981
18.2 0.304987 0.01319 -0.109040 -0.053215 0.196815 -0.33099
18.3 0.361606 0.17932 -0.029074 0.216221 0.072679 0.03053
19.1 -0.087091 -0.13819 0.373005 -0.361180 0.404135 0.30193
19.2 -0.027299 0.02298 0.462292 -0.090361 -0.140101 -0.28215
19.3 0.045566 0.16374 0.589995 0.186159 0.353408 -0.03249
20.1 0.268320 -0.15880 -0.142663 -0.329913 -0.458398 -0.01869
20.2 0.245208 0.13184 -0.296977 -0.095246 0.200134 -0.06998
20.3 0.346150 0.22876 -0.086776 0.193517 -0.396749 -0.25353
21.1 -0.186799 -0.62271 -0.285519 0.104833 0.222455 -0.16266
21.2 -0.136571 -0.44660 -0.224335 0.371481 -0.452233 0.14841
21.3 -0.085269 -0.27217 -0.159995 0.638598 -0.151090 -0.16126
22.1 0.246505 -0.21154 -0.105687 -0.294846 0.305233 -0.10161
22.2 0.283674 -0.01504 -0.082871 -0.033892 0.566155 0.27232
22.3 0.343882 0.14548 0.007638 0.237108 0.059194 -0.30408
23.1 -0.015145 0.04058 0.316605 -0.491635 -0.191172 0.31258
23.2 -0.164506 0.52838 -0.208676 -0.312021 0.232632 0.20883
23.3 -0.148341 0.75768 -0.247578 -0.060226 -0.436640 0.07139
24.1 -0.205772 0.25500 -0.152677 -0.530942 0.052015 -0.05579
24.2 -0.015313 0.21212 0.320561 -0.203143 0.074297 0.25842
24.3 -0.021241 0.47593 0.216739 0.039017 -0.093684 -0.05365
25.1 -0.400249 -0.44333 0.295791 -0.075752 -0.109384 -0.21485
25.2 -0.464922 -0.08779 0.019356 0.140792 0.133855 -0.13518
25.3 -0.319682 -0.06006 0.359722 0.448872 0.581566 0.23949
26.1 -0.383493 -0.01454 -0.108384 -0.315296 -0.110018 -0.87053
26.2 -0.352790 0.19206 -0.104569 -0.057161 0.325164 -0.04719
26.3 -0.401662 0.52293 -0.334576 0.166273 -0.001215 -0.46178
27.1 0.081595 -0.25900 -0.248618 -0.207809 0.332778 -0.48665
27.2 0.158305 -0.12424 -0.109618 0.070387 0.176887 -0.36220
27.3 0.208346 0.05216 -0.048983 0.336954 -0.087268 -0.13909
28.1 0.354847 -0.07963 -0.051933 -0.417118 0.021101 0.09374
28.2 0.380020 0.13560 -0.064369 -0.161395 0.322477 -0.06366
28.3 0.447128 0.28535 0.046417 0.112614 -0.142647 -0.07240
29.1 -0.306095 0.05709 -0.055678 -0.388957 -0.101628 -0.14227
29.2 -0.159940 0.08340 0.287378 -0.080478 -0.040898 -0.23970
29.3 -0.072356 0.20117 0.458329 0.202460 -0.248010 -0.02947
30.1 0.359796 -0.06928 -0.042384 -0.427028 -0.257266 -0.11242
30.2 0.407568 0.11067 0.011585 -0.161451 -0.174958 -0.29532
30.3 0.446943 0.30372 0.040880 0.100465 -0.010379 0.09847
31.1 0.143499 -0.30739 -0.088959 -0.211496 -0.297677 0.51970
31.2 0.184445 -0.11678 -0.055047 0.051105 -0.159903 0.61045
31.3 0.228322 0.06925 -0.012525 0.314984 -0.142920 0.49250
32.1 -0.115205 -0.48872 -0.250582 -0.009349 -0.097580 0.23211
32.2 -0.042929 -0.34705 -0.124610 0.266914 -0.039874 0.25049
32.3 0.009709 -0.17470 -0.056344 0.534613 0.256921 0.10515
Biplot scores for constraining variables
RDA1 RDA2 RDA3 RDA4 PC1 PC2
CondCS -0.5747 -0.5368 -0.1640 0.5004 0 0
Velocity.1 -0.1502 -0.5640 -0.1297 -0.8016 0 0
CunAll01CS -0.6746 0.6114 -0.3795 -0.1642 0 0
Binary_Bio -0.7495 0.3742 0.4862 -0.2175 0 0

## Sheet: Ordisurf
> summary(ordiSalinity1)
Family: gaussian
Link function: identity
Formula:
y ~ s(x1, x2, k = 10, bs = "tp", fx = FALSE)
Parametric coefficients:
Estimate Std. Error t value Pr(>|t|)
(Intercept) 1.053e-11 7.744e-02 0 1
Approximate significance of smooth terms:
edf Ref.df F p-value
s(x1,x2) 7.644 9 7.888 2.15e-10 ***
---
Signif. codes: 0 ‘***’ 0.001 ‘**’ 0.01 ‘*’ 0.05 ‘.’ 0.1 ‘ ’ 1
R-sq.(adj) = 0.43 Deviance explained = 47.7%
-REML = 119.69 Scale est. = 0.56973 n = 95
> summary(ordiSalinity2)
Family: gaussian
Link function: identity
Formula:
y ~ s(x1, x2, k = 10, bs = "tp", fx = FALSE)
Parametric coefficients:
Estimate Std. Error t value Pr(>|t|)
(Intercept) 1.7130 0.1448 11.83 <2e-16 ***
---
Signif. codes: 0 ‘***’ 0.001 ‘**’ 0.01 ‘*’ 0.05 ‘.’ 0.1 ‘ ’ 1
Approximate significance of smooth terms:
edf Ref.df F p-value
s(x1,x2) 1.884 9 3.585 3.86e-07 ***
---
Signif. codes: 0 ‘***’ 0.001 ‘**’ 0.01 ‘*’ 0.05 ‘.’ 0.1 ‘ ’ 1
R-sq.(adj) = 0.256 Deviance explained = 27%
-REML = 170.86 Scale est. = 1.9907 n = 95

## Sheet: Adonis2
adonis2(formula = dis.inverts ~ env5$Treatment * env5$CondCS, strata = env5$Mesocosm)
Df SumOfSqs R2 F Pr(>F)
env5$Treatment 1 0.9946 0.05636 5.8703 0.001 ***
env5$CondCS 1 0.9745 0.05522 5.7517 0.001 ***
env5$Treatment:env5$CondCS 1 0.2594 0.01470 1.5309 0.097 .
Residual 91 15.4177 0.87371
Total 94 17.6461 1.00000
---
Signif. codes: 0 ‘***’ 0.001 ‘**’ 0.01 ‘*’ 0.05 ‘.’ 0.1 ‘ ’ 1

## Sheet: Variance partitioning
Partition of variance in RDA
Call: varpart(Y = cotter01RAHell, X = invertEnv, invertBio3, InvertMesoEffect1)
Explanatory tables:
X1: invertEnv
X2: invertBio3
X3: InvertMesoEffect1
No. of explanatory tables: 3
Total variation (SS): 46.228
Variance: 0.49179
No. of observations: 95
Partition table:
Df R.square Adj.R.square Testable
[a+d+f+g] = X1 3 0.08730 0.05722 TRUE
[b+d+e+g] = X2 2 0.06784 0.04757 TRUE
[c+e+f+g] = X3 1 0.01432 0.00372 TRUE
[a+b+d+e+f+g] = X1+X2 5 0.14171 0.09349 TRUE
[a+c+d+e+f+g] = X1+X3 4 0.09859 0.05853 TRUE
[b+c+d+e+f+g] = X2+X3 3 0.08240 0.05215 TRUE
[a+b+c+d+e+f+g] = All 6 0.15084 0.09294 TRUE
Individual fractions
[a] = X1 | X2+X3 3 0.04080 TRUE
[b] = X2 | X1+X3 2 0.03441 TRUE
[c] = X3 | X1+X2 1 -0.00055 TRUE
[d] 0 0.01401 FALSE
[e] 0 0.00186 FALSE
[f] 0 0.00512 FALSE
[g] 0 -0.00271 FALSE
[h] = Residuals 0.90706 FALSE
Controlling 1 table X
[a+d] = X1 | X3 3 0.05481 TRUE
[a+f] = X1 | X2 3 0.04592 TRUE
[b+d] = X2 | X3 2 0.04842 TRUE
[b+e] = X2 | X1 2 0.03628 TRUE
[c+e] = X3 | X1 1 0.00132 TRUE
[c+f] = X3 | X2 1 0.00457 TRUE
---
Use function ‘rda’ to test significance of fractions of interest
> rda.result1 <- rda(cotter01RAHell ~ invertEnv + Condition(invertBio3) + Condition(InvertMesoEffect1))
> anova(rda.result1, step=200, perm.max=200)
Permutation test for rda under reduced model
Permutation: free
Number of permutations: 999
Model: rda(formula = cotter01RAHell ~ invertEnv + Condition(invertBio3) + Condition(InvertMesoEffect1))
Df Variance F Pr(>F)
Model 3 0.03366 2.3643 0.001 ***
Residual 88 0.41761
---
Signif. codes: 0 ‘***’ 0.001 ‘**’ 0.01 ‘*’ 0.05 ‘.’ 0.1 ‘ ’ 1
> rda.result2 <- rda(cotter01RAHell ~ invertBio3 + Condition(invertEnv) + Condition(InvertMesoEffect1))
> anova(rda.result2, step=200, perm.max=200)
Permutation test for rda under reduced model
Permutation: free
Number of permutations: 999
Model: rda(formula = cotter01RAHell ~ invertBio3 + Condition(invertEnv) + Condition(InvertMesoEffect1))
Df Variance F Pr(>F)
Model 2 0.02569 2.7072 0.001 ***
Residual 88 0.41761
---
Signif. codes: 0 ‘***’ 0.001 ‘**’ 0.01 ‘*’ 0.05 ‘.’ 0.1 ‘ ’ 1
> rda.result3 <- rda(cotter01RAHell ~ InvertMesoEffect1 + Condition(invertBio3) + Condition(invertEnv))
> anova(rda.result3, step=200, perm.max=200)
Permutation test for rda under reduced model
Permutation: free
Number of permutations: 999
Model: rda(formula = cotter01RAHell ~ InvertMesoEffect1 + Condition(invertBio3) + Condition(invertEnv))
Df Variance F Pr(>F)
Model 1 0.00449 0.9463 0.499
Residual 88 0.41761

## Sheet: betadisper
> beta1<-betadisper(dis.inverts, env5$Salinity)
> anova(beta1)
Response: Distances
Df Sum Sq Mean Sq F value Pr(>F)
Groups 4 0.04818 0.012044 1.0009 0.4114
Residuals 90 1.08296 0.012033
> beta2<-betadisper(dis.inverts, env5$Treatment)
> anova(beta2)
Analysis of Variance Table
Response: Distances
Df Sum Sq Mean Sq F value Pr(>F)
Groups 1 0.11482 0.114818 10.365 0.001769 **
Residuals 93 1.03022 0.011078
